# Supplementary material for: Runx3 alleviates osteoarthritis through microRNA regulating multiple inflammation-related pathways
Source: Research Square preprint supplement (doi:10.21203/rs.3.rs-7458996/v1), 2025-10-20
Supplement: Supplementary file 1 [file 122af69b066aaa1d2d288e12.docx]

Table S2. List of top 20 differentially expressed known miRNAs under the treatment of Runx3 overexpression (OE- Runx3)

| MiRNAs name | Blank | OE-Runx3 | log2 fold change | p value |
| --- | --- | --- | --- | --- |
| Readnum | Readnum | (OE-Runx3/Blank) |
| mmu-miR-7a-5p | 11843 | 17519 | 1.0956 | 0 |
| mmu-miR-31-5p | 11008 | 3699 | -1.0422 | 0 |
| mmu-miR-5099 | 3877 | 1113 | -1.2694 | 7.02E-180 |
| mmu-miR-673-5p | 2380 | 793 | -1.0544 | 3.70E-83 |
| mmu-miR-361-3p | 1900 | 2778 | 1.0791 | 3.51E-144 |
| mmu-let-7i-3p | 1742 | 535 | -1.1721 | 1.94E-72 |
| mmu-miR-181c-5p | 1124 | 364 | -1.0956 | 1.08E-42 |
| mmu-miR-5121 | 632 | 108 | -2.0178 | 1.82E-58 |
| mmu-miR-3473b | 614 | 93 | -2.1919 | 5.92E-63 |
| mmu-miR-3473a | 536 | 89 | -2.0593 | 3.86E-51 |
| mmu-miR-665-3p | 497 | 159 | -1.1131 | 2.84E-20 |
| mmu-miR-376a-3p | 362 | 92 | -1.4452 | 4.92E-22 |
| mmu-miR-1981-5p | 348 | 696 | 1.5311 | 2.95E-63 |
| mmu-miR-33-5p | 315 | 87 | -1.3252 | 3.53E-17 |
| mmu-miR-130b-3p | 301 | 98 | -1.0878 | 1.83E-12 |
| mmu-miR-221-5p | 249 | 373 | 1.1141 | 7.02E-22 |
| mmu-miR-3099-3p | 210 | 49 | -1.5685 | 5.80E-15 |
| mmu-miR-3473e | 198 | 25 | -2.4544 | 2.54E-24 |
| mmu-miR-1306-5p | 182 | 58 | -1.1187 | 2.08E-08 |
| mmu-miR-341-5p | 182 | 62 | -1.0225 | 1.90E-07 |

Note: Read number (Readnum)
