# Supplementary material for: Runx3 alleviates osteoarthritis through microRNA regulating multiple inflammation-related pathways
Source: Research Square preprint supplement (doi:10.21203/rs.3.rs-7458996/v1), 2025-10-20
Supplement: Supplementary file 2 [file 659e4b7d59cc0245bb845842.docx]

Table S4. List of top 20 differentially expressed novel miRNAs under the treatment of Runx3 overexpression (OE- Runx3)

| MiRNAs name | Blank | OE-Runx3 | log2 fold change | p value |
| --- | --- | --- | --- | --- |
| Readnum | Readnum | (OE-Runx3/Blank) |
| mmu-miR-95 | 71 | 0 | -6.4191 | 6.00E-15 |
| mmu-miR-18 | 52 | 11 | -1.5104 | 2.32E-04 |
| mmu-miR-87 | 46 | 8 | -1.7929 | 9.12E-05 |
| mmu-miR-83 | 32 | 0 | -5.2694 | 1.53E-07 |
| mmu-miR-31 | 28 | 0 | -5.0767 | 1.00E-06 |
| mmu-miR-85 | 28 | 8 | -1.0767 | 3.80E-02 |
| mmu-miR-25 | 20 | 0 | -4.5913 | 4.78E-05 |
| mmu-miR-19 | 17 | 0 | -4.3568 | 2.12E-04 |
| mmu-miR-16 | 14 | 0 | -4.0767 | 9.59E-04 |
| mmu-miR-3 | 14 | 0 | -4.0767 | 9.59E-04 |
| mmu-miR-53 | 14 | 0 | -4.0767 | 9.59E-04 |
| mmu-miR-17 | 12 | 0 | -3.8543 | 2.66E-03 |
| mmu-miR-9 | 12 | 0 | -3.8543 | 2.66E-03 |
| mmu-miR-133 | 0 | 169 | 9.1315 | 2.90E-43 |
| mmu-miR-128 | 0 | 46 | 7.2542 | 2.53E-15 |
| mmu-miR-135 | 0 | 13 | 5.4311 | 1.57E-05 |
| mmu-miR-117 | 0 | 12 | 5.3156 | 3.43E-05 |
| mmu-miR-120 | 0 | 12 | 5.3156 | 3.43E-05 |
| mmu-miR-118 | 0 | 11 | 5.1900 | 7.55E-05 |
| mmu-miR-140 | 0 | 11 | 5.1900 | 7.55E-05 |

Note: Read number (Readnum)
