# Supplementary material for: Runx3 alleviates osteoarthritis through microRNA regulating multiple inflammation-related pathways
Source: Research Square preprint supplement (doi:10.21203/rs.3.rs-7458996/v1), 2025-10-20
Supplement: Supplementary file 3 [file 821f8555cb7afe513329ec36.docx]

Table S6. Sequences of primers for qRT-PCR

| Gene | Primer | Sequence |
| --- | --- | --- |
| Runx3 | Forward primer | CAGGTTCAACGACCTTCGATT |
|  | Reverse primer | GTGGTAGGTAGCCACTTGGG |
| Sox9 | Forward primer | TCCACGAAGGGTCTCTTCTC |
|  | Reverse primer | AGGAAGCTGGCAGACCAGTA |
| Col2a1 | Forward primer | ACATAGGGCCTGTCTGCTTCTTGT |
|  | Reverse primer | TGACTGCGGTTGGAAAGTGTTTGG |
| Acan | Forward primer | CCTGCTACTTCATCGACCCC |
|  | Reverse primer | AGATGCTGTTGACTCGAACCT |
| MMP13 | Forward primer | CTTCTTCTTGTTGAGCTGGACTC |
|  | Reverse primer | CTGTGGAGGTCACTGTAGACT |
| Fgfr3 | Forward primer | TGGATCAGTGAGAATGTGGAGG |
|  | Reverse primer | CCTATGAAATTGGTGGCTCGAC |
| Comp | Forward primer | ACTGCCTGCGTTCTAGTGC |
|  | Reverse primer | CGCCGCATTAGTCTCCTGAA |
| BMP6 | Forward primer | AGAAGCGGGAGATGCAAAAGG |
|  | Reverse primer | GACAGGGCGTTGTAGAGATCC |
| Gapdh | Forward primer | GCACAGTCAAGGCCGAGAAT |
|  | Reverse primer | GCCTTCTCCATGGTGGTGAA |
