# Supplementary material for: Runx3 alleviates osteoarthritis through microRNA regulating multiple inflammation-related pathways
Source: Research Square preprint supplement (doi:10.21203/rs.3.rs-7458996/v1), 2025-10-20
Supplement: Supplementary file 4 [file a2b02498e44d90e08b197577.docx]

Table S1. Statistics of miRNAs and its targets

| Sample | MiRNA number | |  | Target gene number | |
| --- | --- | --- | --- | --- | --- |
| Known | Novel |  | Known | Novel |
| Blank | 1051 | 107 |  | 34530 | 30289 |
| OE-Runx3 | 945 | 76 |  | 34449 | 24568 |
| Blank | 892 | 65 |  | 34418 | 25999 |
| SI-Runx3 | 934 | 65 |  | 34463 | 24014 |
