# Supplementary material for: Runx3 alleviates osteoarthritis through microRNA regulating multiple inflammation-related pathways
Source: Research Square preprint supplement (doi:10.21203/rs.3.rs-7458996/v1), 2025-10-20
Supplement: Supplementary file 5 [file de0d2432c8d4fca6535982b6.docx]

Table S5. List of top 20 differentially expressed novel miRNAs under the treatment of Runx3 silencing (SI- Runx3)

| MiRNAs name | Blank | SI-Runx3 | log2 fold change | p value |
| --- | --- | --- | --- | --- |
| Readnum | Readnum | (SI-Runx3/Blank) |
| mmu-miR-12 | 24 | 12 | -1.0678 | 3.10E-02 |
| mmu-miR-167 | 17 | 0 | -5.1553 | 1.59E-05 |
| mmu-miR-10 | 14 | 0 | -4.8752 | 1.01E-04 |
| mmu-miR-153 | 11 | 0 | -4.5273 | 6.77E-04 |
| mmu-miR-156 | 11 | 0 | -4.5273 | 6.77E-04 |
| mmu-miR-161 | 11 | 0 | -4.5273 | 6.77E-04 |
| mmu-miR-146 | 10 | 0 | -4.3898 | 1.29E-03 |
| mmu-miR-49 | 15 | 45 | 1.5171 | 1.49E-04 |
| mmu-miR-162 | 8 | 25 | 1.5760 | 3.66E-03 |
| mmu-miR-83 | 8 | 22 | 1.3916 | 1.29E-02 |
| mmu-miR-186 | 0 | 32 | 5.9322 | 6.01E-09 |
| mmu-miR-122 | 0 | 23 | 5.4557 | 8.42E-07 |
| mmu-miR-173 | 0 | 18 | 5.1021 | 1.48E-05 |
| mmu-miR-16 | 0 | 14 | 4.7395 | 1.57E-04 |
| mmu-miR-189 | 0 | 14 | 4.7395 | 1.57E-04 |
| mmu-miR-51 | 0 | 13 | 4.6326 | 2.88E-04 |
| mmu-miR-185 | 0 | 13 | 4.6326 | 2.88E-04 |
| mmu-miR-176 | 0 | 12 | 4.5171 | 5.29E-04 |
| mmu-miR-190 | 0 | 12 | 4.5171 | 5.29E-04 |
| mmu-miR-46 | 0 | 11 | 4.3916 | 9.77E-04 |

Note: Read number (Readnum)
