# Supplementary material for: Runx3 alleviates osteoarthritis through microRNA regulating multiple inflammation-related pathways
Source: Research Square preprint supplement (doi:10.21203/rs.3.rs-7458996/v1), 2025-10-20
Supplement: Supplementary file 6 [file e403cc4942ce784b8c725b3e.docx]

Table S3. List of top 20 differentially expressed known miRNAs under the treatment of Runx3 silencing (SI- Runx3)

| MiRNAs name | Blank | SI-Runx3 | log2 fold change | p value |
| --- | --- | --- | --- | --- |
| Readnum | Readnum | (SI-Runx3/Blank) |
| mmu-miR-21a-5p | 1495284 | 899874 | -1.3894 | 0 |
| mmu-miR-409-3p | 14167 | 7217 | -1.6298 | 0 |
| mmu-miR-320-3p | 14124 | 9158 | -1.2818 | 0 |
| mmu-miR-92a-3p | 11790 | 7260 | -1.3563 | 0 |
| mmu-miR-7a-5p | 9715 | 7299 | -1.0693 | 0 |
| mmu-miR-183-5p | 7185 | 4201 | -1.4310 | 0 |
| mmu-miR-501-3p | 6571 | 4343 | -1.2542 | 0 |
| mmu-miR-31-5p | 6486 | 1276 | -3.0025 | 0 |
| mmu-miR-221-3p | 5349 | 2619 | -1.6870 | 0 |
| mmu-miR-222-3p | 4863 | 2088 | -1.8765 | 0 |
| mmu-miR-146a-5p | 2862 | 678 | -2.7344 | 0 |
| mmu-miR-185-5p | 2843 | 1744 | -1.3618 | 2.22E-223 |
| mmu-miR-451a | 2522 | 170 | -4.5477 | 0 |
| mmu-miR-129-5p | 1586 | 715 | -1.8061 | 3.10E-188 |
| mmu-miR-181a-1-3p | 927 | 3994 | 1.4504 | 5.16E-219 |
| mmu-miR-6538 | 889 | 142 | -3.3031 | 8.58E-210 |
| mmu-miR-3535 | 876 | 612 | -1.1742 | 4.69E-56 |
| mmu-miR-7688-5p | 553 | 401 | -1.1204 | 1.50E-33 |
| mmu-miR-486b-5p | 456 | 244 | -1.5589 | 2.30E-45 |
| mmu-miR-486a-5p | 454 | 242 | -1.5645 | 2.13E-45 |

Note: Read number (Readnum)
